# Supplementary material for: One-step and green synthesis of nitrogen-doped carbon quantum dots for multifunctional electronics
Source: Royal Society of Chemistry journal article supplement (doi:10.1039/c7ra03840b), 2017-01-01
Supplement: c7ra03840b1.pdf [file c7ra03840b1.pdf]

## Supplementary Information

*Zhan Wang, Lijun Cao, Yamei Ding, Rui Shi, Xiangjing Wang, Hang Lu, Zhengdong Liu, Fei Xiu, Juqing Liu,\* Wei Huang\**

<sup>a</sup> Key Laboratory of Flexible Electronics (KLOFE) & Institute of Advanced Materials (IAM), Jiangsu National Synergistic Innovation Center for Advanced Materials (SICAM), Nanjing Tech University (NanjingTech), 30 South Puzhu Road, Nanjing 211816, P.R. China. E-mail: iamjqliu@njtech.edu.cn; iamwhuang@njtech.edu.cn.

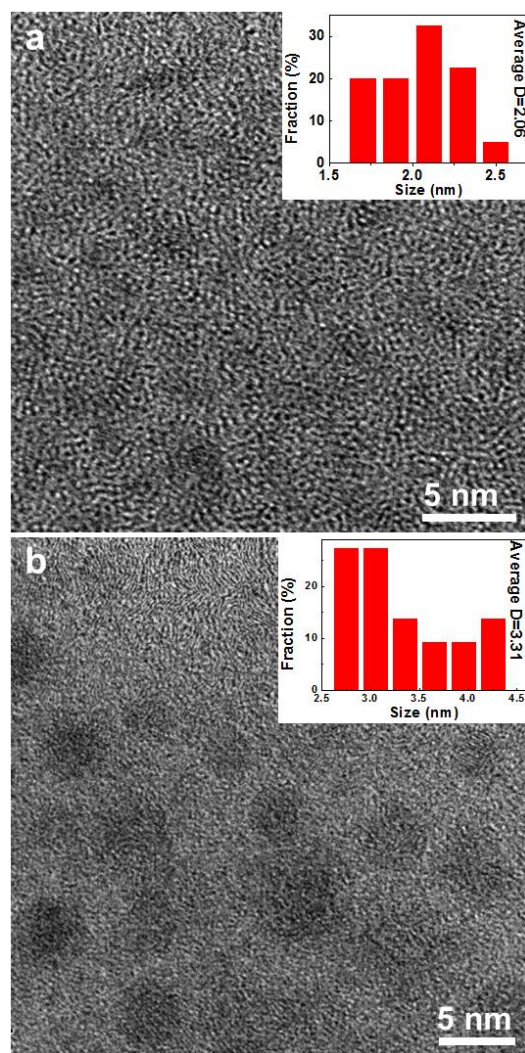

**Fig. S1** TEM images of (a) as-prepared *g*-CQDs and (b) *b*-CQDs; inset in (a), (b) is size distribution of *g*-CQDs and *b*-CQDs, respectively.

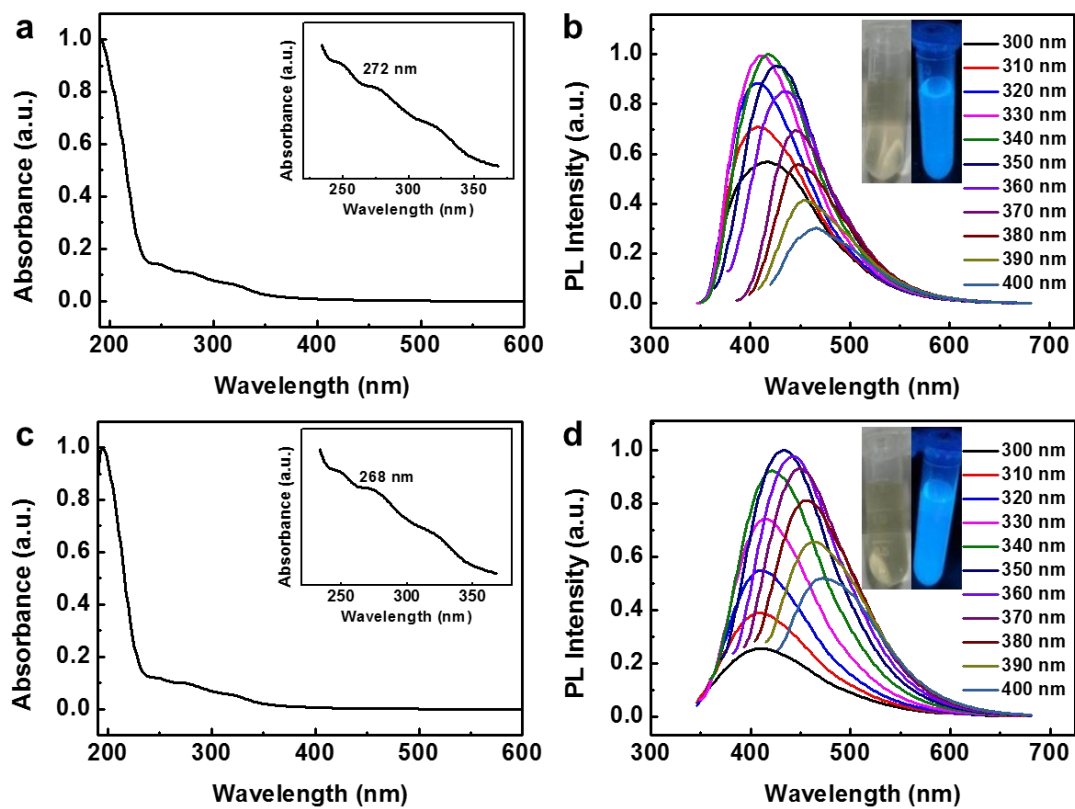

**Fig. S2** UV-vis absorption of (a) *g*-CQDs and (c) *b*-CQDs; Photoluminescence spectra of (b) *g*-CQDs and (d) *b*-CQDs in water, inset in (b), (d) is photos of *g*-CQDs and *b*-CQDs aqueous solution under visible and UV irradiation (365 nm), respectively.

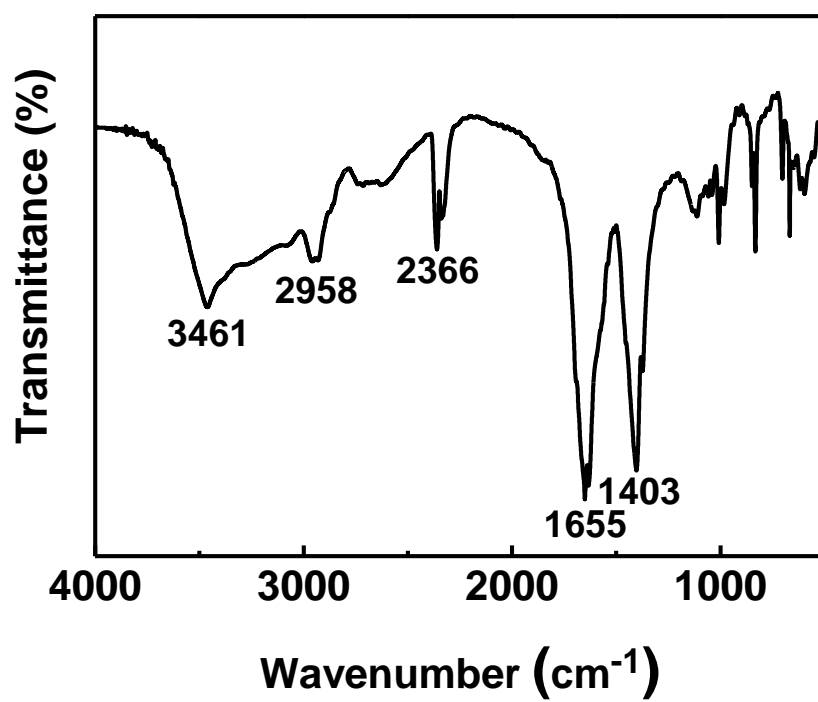

Fig. S3 FT-IR spectrum of s-CQDs.
